# Supplementary material for: Health Safety Assessment of Ready-to-Eat Products Consumed by Children Aged 0.5–3 Years on the Polish Market
Source: MDPI journal article supplement (doi:10.3390/nu14112325), 2022-06-01
Supplement: s1 [file s1]

# Health Safety Assessment of Ready-to-Eat Products Consumed by Children Aged 0.5–3 Years on the Polish Market

Anita Żmudzińska \*, Anna Puścion-Jakubik, Joanna Bielecka, Monika Grabia, Jolanta Soroczynska, Konrad Mielcarek and Katarzyna Socha

Department of Bromatology, Faculty of Pharmacy with the Division of Laboratory Medicine, Medical University of Białystok, Mickiewicza 2D Street, 15-222 Białystok, Poland; anna.puscion-jakubik@umb.edu.pl (A.P.-J.); joanna.bielecka@umb.edu.pl (J.B.); monika.grabia@umb.edu.pl (M.G.); jolanta.soroczynska@umb.edu.pl (J.S.); konrad.mielcarek@umb.edu.pl (K.M.); katarzyna.socha@umb.edu.pl (K.S.)

\* Correspondence: anita.zmudzinska@umb.edu.pl; Tel.: +48-85-748-5469

**Table S1.** The content of toxic elements in tested products.

| Type of products | <i>n</i> | As<br>(µg/kg)                                  | Cd<br>(µg/kg)                                   | Hg<br>(µg/kg)                                    | Pb<br>(µg/kg)                                   |
|------------------|----------|------------------------------------------------|-------------------------------------------------|--------------------------------------------------|-------------------------------------------------|
|                  |          | X ± SD                                         | X ± SD                                          | X ± SD                                           | X ± SD                                          |
|                  |          | (Min-Max)                                      | (Min-Max)                                       | (Min-Max)                                        | (Min-Max)                                       |
|                  |          | Me(Q1-Q3)                                      | Me(Q1-Q3)                                       | Me(Q1-Q3)                                        | Me(Q1-Q3)                                       |
| BABY DINNERS     | 102      | 1.86 ± 0.42<br>(<LOD-16.97)<br>0.19(0.16-0.67) | 2.31 ± 0.33<br>(0.30-20.15)<br>1.22(0.78-2.03)  | 2.97 ± 0.44<br>(<LOD-37.25)<br>1.46(0.51-4.02)   | 7.55 ± 0.41 (0.52-32.27)<br>6.76(5.57-9.17)     |
| -with poultry    | 24       | 0.24 ± 0.04<br>(<LOD -0.79)<br>0.17(0.15-0.32) | 1.19 ± 0.14<br>(0.42-2.72)<br>1.07(0.62-1.79)   | 3.54 ± 1.55<br>(<LOD-37.25)<br>0.97(0.34-3.58)   | 8.46 ± 1.29<br>(0.76-32.27)<br>7.32(5.65-10.43) |
| -with beef       | 16       | 0.34 ± 0.06<br>(0.15-1.17)<br>0.24(0.16-0.42)  | 1.77 ± 0.41<br>(0.51-7.35)<br>1.25(0.73-2.06)   | 2.50 ± 3.36<br>(0.23-10.26)<br>0.64(0.52-4.24)   | 5.32 ± 0.76<br>(0.52-10.81)<br>5.38(3.33-6.36)  |
| -with pork       | 13       | 0.28 ± 0.058<br>(<LOD-0.69)<br>0.26(0.16-0.33) | 3.31 ± 1.08<br>(0.57-11.79)<br>1.73(0.57-11.79) | 1.64 ± 0.74<br>(<LOD-9.51)<br>0.37(0.16-2.03)    | 7.24 ± 1.12<br>(2.26-17.13)<br>6.37(4.75-10.21) |
| -with fish       | 18       | 2.88 ± 1.27<br>(0.52-16.97)<br>1.94(1.11-3.48) | 3.67 ± 1.35<br>(0.42-20.15)<br>1.38(5.90-9.17)  | 9.21 ± 0.57<br>(1.81-16.97)<br>10.52(3.60-13.04) | 8.02 ± 0.63<br>(5.28-13.60)<br>7.06(5.90-9.17)  |
| -with rabbit     | 11       | 0.31 ± 0.1<br>(<LOD-1.02)<br>0.18(0.16-0.36)   | 1.39 ± 0.27<br>(0.30-0.58)<br>1.14(0.58-1.87)   | 2.59 ± 0.96<br>(<LOD-9.87)<br>1.23(0.20-4.51)    | 7.87 ± 1.27<br>(1.86-15.63)<br>7.82(5.40-10.46) |
| -vegetarian      | 20       | 0.29 ± 0.06<br>(0.13-1.11)<br>0.161(0.15-0.31) | 2.74 ± 0.77<br>(0.31-11.56)<br>1.63(0.96-2.07)  | 3.86 ± 0.68<br>(1.08-11.83)<br>2.44(1.83-5.11)   | 7.86 ± 0.52<br>(5.47-13.03)<br>1.63(0.96-2.07)  |
| PORRIDGE         | 50       | 2.30 ± 0.33<br>(<LOD-8.48)<br>1.11(0.62-3.60)  | 2.77 ± 0.40<br>(0.46-16.03)<br>1.71(1.25-3.12)  | 4.2 ± 0.35<br>(0.72-9.11)<br>4.20(1.41-6.04)     | 8.09 ± 0.70<br>(1.96-25.37)<br>6.28(5.34-8.26)  |
| -with milk       | 8        | 0.61 ± 0.12<br>(<LOD-1.16)<br>0.63 (0.46-0.76) | 1.66 ± 0.49<br>(0.68-5.03)<br>1.31(1.00-1.45)   | 3.01 ± 1.06<br>(0.95-8.97)<br>1.28(1.03-4.76)    | 6.21 ± 0.82<br>(4.42-10.38)<br>5.16(4.76-7.52)  |

|                                |    |                                                 |                                                 |                                                |                                                   |
|--------------------------------|----|-------------------------------------------------|-------------------------------------------------|------------------------------------------------|---------------------------------------------------|
| -with milk and fruit           | 15 | 1.47 ± 0.32<br>(0.23-4.40)<br>0.95(0.58-2.24)   | 1.98 ± 0.33<br>(0.46-4.68)<br>1.48(1.10-2.92)   | 3.60 ± 0.54<br>(0.72-6.35)<br>3.45(1.41-6.04)  | 7.90 ± 1.4<br>(3.97-24.26)<br>6.18(5.1-7.14)      |
| -cereal gluten                 | 12 | 1.66 ± 0.54<br>(0.21-6.95)<br>0.97(0.21-6.95)   | 3.30 ± 0.83<br>(0.67-9.31)<br>2.07(1.28-4.70)   | 4.86 ± 0.59<br>(1.25-8.99)<br>5.04(3.39-5.75)  | 8.61 ± 1.58<br>(1.96-17.93)<br>6.95(4.84-12.07)   |
| -cereal gluten free            | 15 | 4.31 ± 0.72<br>(0.18-8.48)<br>4.47(1.55-7.40)   | 3.72 ± 1.04<br>(0.69-16.03)<br>2.09(1.41-4.25)  | 4.89 ± 0.69<br>(0.91-9.11)<br>6.00(1.52-6.33)  | 8.87 ± 1.36<br>(5.35-25.37)<br>6.75(5.63-9.52)    |
| FRUIT AND<br>VEGETABLE MOUSSES | 58 | 0.19 ± 0.48<br>(<LOD-0.54)<br>0.17(0.147-0.311) | 1.39 ± 2.32<br>(0.15-10.14)<br>0.66(0.49-1.46)  | 3.93 ± 0.26<br>(0.95-23.86)<br>3.12(1.73-5.01) | 7.97 ± 0.02<br>(3.03-138.99)<br>4.95(4.41-6.61)   |
| -fruit and vegetables          | 9  | 0.21 ± 2.43<br>(<LOD-0.54)<br>0.17(0.14-0.34)   | 2.27 ± 0.88<br>(0.37-9.77)<br>0.65(0.56-1.23)   | 5.75 ± 1.12<br>(1.01-23.86)<br>3.66(1.24-5.45) | 5.98 ± 0.06<br>(3.95-10.60)<br>0.17(0.14-0.34)    |
| -fruit                         | 33 | 0.19 ± 0.03<br>(<LOD-0.40)<br>0.17 (<LOD-0.31)  | 1.22 ± 0.33<br>(0.16-10.14)<br>0.65 (0.41-0.90) | 3.77 ± 0.46<br>(0.95-13.24)<br>3.24(2.10-5.01) | 9.40 ± 4.06<br>(3.03-138.9)<br>4.84(0.00-0.31)    |
| -fruit and cereal              | 6  | 0.16 ± 0.09<br>(<LOD-0.29)<br>0.17(0.15-0.17)   | 0.74 ± 0.54<br>(0.15-1.56)<br>0.57(0.39-1.22)   | 3.47 ± 2.50<br>(1.72-8.21)<br>2.42(1.76-4.27)  | 6.58 ± 4.27<br>(4.00-15.19)<br>5.00(4.46-5.80)    |
| -fruit and dairy               | 6  | 0.23 ± 0.14<br>(<LOD-0.36)<br>0.25(0.17-0.35)   | 1.24 ± 2.30<br>(0.24-3.33)<br>0.72(0.42-2.01)   | 3.71 ± 2.30<br>(1.07-6.35)<br>3.44(1.72-6.21)  | 6.24 ± 1.47<br>(3.92-7.69)<br>6.47(5.28-7.58)     |
| -vegetables                    | 4  | 0.18 ± 0.15<br>(<LOD-0.37)<br>0.18(0.08-0.28)   | 1.93 ± 0.27<br>(1.68-2.19)<br>1.92(1.69-2.16)   | 2.26 ± 0.83<br>(1.55-3.27)<br>2.11(1.58-2.93)  | 5.41 ± 1.91<br>(3.54-8.05)<br>5.01(4.13-6.67)     |
| BABY DRINKS                    | 64 | 0.88 ± 2.04<br>(<LOD-9.09)<br>0.15(0.14-0.29)   | 3.39 ± 1.3<br>(0.14-18.54)<br>0.48(0.29-1.14)   | 2.89 ± 1.87<br>(1.00-9.11)<br>2.31(1.45-3.78)  | 1.14 ± 0.98<br>(0.46-3.96)<br>9.98(8.88-13.33)    |
| -fruit drinks and water        | 22 | 2.27 ± 3.13<br>(<LOD-9.09)<br>0.16(0.13-3.73)   | 4.17 ± 5.98<br>(0.16-18.54)<br>1.2(0.50-5.02)   | 2.90 ± 1.62<br>(1.00-7.38)<br>1.01(1.87-3.73)  | 1.79 ± 1.97<br>(0.46-3.96)<br>1.42(0.46-3.97)     |
| -fruit juices                  | 42 | 0.19 ± 0.15<br>(<LOD-0.65)<br>0.15(0.14-0.27)   | 0.66 ± 2.01<br>(0.14-6.82)<br>0.38(0.28-0.58)   | 2.88 ± 2.00<br>(1.00-9.11)<br>2.1(1.41-4.09)   | 1.03 ± 0.27<br>(0.57-2.16)<br>0.98(0.87-1.10)     |
| SNACKS<br>“FOR THE HAND”       | 62 | 2.92 ± 10.77<br>(0.19-2.91)<br>0.78(0.38-2.00)  | 3.09 ± 1.69<br>(0.46-16.08)<br>2.29(1.43-3.44)  | 2.36 ± 1.69 (<LOD-7.02)<br>1.97(1.05-3.25)     | 12.8 ± 7.56 (4.54-48.18)<br>10.68(8.85-14.30)     |
| -waffle/crisps                 | 30 | 4.88 ± 15.34<br>(0.19-84.71)<br>0.78(0.38-3.26) | 3.51 ± 3.38<br>(0.46-16.08)<br>2.62(1.31-3.80)  | 2.23 ± 1.59<br>(0.34-6.46)<br>1.46(1.2-3.2)    | 13.83 ± 9.08<br>(4.54-48.18)<br>11.83(9.22-15.06) |
| -biscuits/cookies              | 17 | 0.93 ± 0.82<br>(0.20-2.72)<br>0.71(0.22-1.22)   | 2.58 ± 1.30<br>(1.19-6.68)<br>2.43(1.63-2.99)   | 2.33 ± 2.10<br>(<LOD-7.02)<br>1.91(1.03-2.70)  | 10.4 ± 4.40<br>(7.01-23.72)<br>9.17(8.01-10.81)   |
| -fruit bars                    | 15 | 1.27 ± 0.86<br>(0.21-2.91)<br>1.15(0.47-1.66)   | 2.83 ± 2.82<br>(0.62-9.81)<br>1.83(0.78-2.85)   | 2.65 ± 1.47<br>(0.73-5.36)<br>2.32(1.31-4.01)  | 14.15 ± 6.73<br>(7.75-30.99)<br>12.09(9.43-14.56) |
| DAIRY                          | 60 | 0.10 ± 0.16<br>(<LOD-0.80)                      | 0.95 ± 2.56<br>(0.11-17.79)                     | 3.02 ± 2.56<br>(0.11-15.23)                    | 6.66 ± 3.11 (2.13-21.01)                          |

|                |     |                  |                 |                 |                  |
|----------------|-----|------------------|-----------------|-----------------|------------------|
|                |     | <LOD(<LOD-0.80)  | 2.13(1.35-4.50) | 2.13(1.35-4.50) | 6.11(4.71-7.29)  |
| -yellow cheese | 28  | 0.11 ± 0.15      | 1.51 ± 3.56     | 2.94 ± 2.99     | 7.5 ± 3.90       |
|                |     | (<LOD-0.58)      | (0.11-17.79)    | (1.00-15.23)    | (3.54-21.01)     |
|                |     | <LOD(<LOD-0.19)  | 0.25(0.20-0.66) | 1.96(1.40-2.85) | 6.51(5.08-8.59)  |
| -yogurt        | 32  | 0.1 ± 0.17       | 0.45 ± 0.78     | 3.09 ± 2.16     | 5.93 ± 2.0       |
|                |     | (<LOD-0.80)      | (0.19-4.64)     | (0.11-7.87)     | (2.13-11.46)     |
|                |     | <LOD(<LOD-0.181) | 0.26(0.21-0.40) | 2.73(1.31-4.83) | 6.04(4.54-6.92)  |
| TOTAL          | 397 | 1.41 ± 0.25      | 2.08 ± 0.15     | 3.16 ± 0.16     | 9.27 ± 0.44      |
|                |     | (<LOD-84.71)     | (0.11-20.15)    | (<LOD-37.25)    | (0.46-138.99)    |
|                |     | 0.23(0.15-0.77)  | 1.12(0.49-2.08) | 2.11(1.21-4.36) | 7.64(5.46-10.31) |

LOD – limits of detection, max – maximum, min – minimum, SD – standard deviation, X – mean.
